# Supplementary material for: Effect of Steam Deactivation Severity of ZSM-5 Additives on LPG Olefins Production in the FCC Process
Source: Molecules. 2017 Oct 21;22(10):1784. doi: 10.3390/molecules22101784 (PMC6151522; doi:10.3390/molecules22101784)
Supplement: Supplementary file 1 [file molecules-22-01784-s001.pdf]

# Effect of Steam Deactivation Severity of ZSM-5 additives on LPG Olefins Production in the FCC process

Andrey A. Gusev <sup>1,2</sup>, Antonios C. Psarras <sup>1</sup>, Konstantinos S. Triantafyllidis <sup>2</sup>, Angelos A. Lappas <sup>1,\*</sup>, Paul A. Diddams <sup>3</sup>

<sup>1</sup> Centre for Research and Technology Hellas, Chemical Process and Energy Resources Institute, 6th km Charilaou-Thermi Road, Thessaloniki 57001, Greece; agusev@cperi.certh.gr (A.A.G.); psarras@cperi.certh.gr (A.C.P.)

<sup>2</sup> Aristotle University of Thessaloniki, Department of Chemistry, University Campus, Thessaloniki 54124, Greece; ktrianta@chem.auth.gr

<sup>3</sup> Johnson Matthey Process Technologies, Technology Center, Bourne Blvd, Savannah, GA 31408, USA; Paul.Diddams@matthey.com

\* Correspondence: [angel@cperi.certh.gr](mailto:angel@cperi.certh.gr); Tel.: +30-2310-498305

## Supplementary Material

### Determination of relative crystallinity of ZSM-5 zeolites

The determination of relative crystallinity of the various steamed ZSM-5 zeolite samples was performed according to the standard ASTM D5758 method, which is based on the comparison of the sum of integrated intensities of the three dominant peaks between 23.1° and 24.3° 2θ. The following equation was used:

$$\% \text{XRD relative crystallinity of steamed ZSM} - 5 = \frac{S_x}{S_r} \times 100 \quad (1)$$

$S_x$  = integrated peaks area for the steamed ZSM – 5

$S_r$  = integrated peaks area for the reference ZSM – 5

The denoted “reference ZSM-5” was in each case the parent-calcined material. In the case of steamed P/H-ZSM-5 zeolite it was the fresh P/H-ZSM-5 zeolite whereas in the case of the steamed P/ZSM-5 additive it was the fresh P/ZSM-5 additive.

**Table S1.** Relative crystallinity of the fresh and steamed P/ZSM-5 zeolites and additives.

| Sample                    | Relative crystallinity, % |
|---------------------------|---------------------------|
| P/H-ZSM-5 zeolite         | 100                       |
| Steamed P/H-ZSM-5 zeolite | 86                        |
| Fresh P/ZSM-5 additive    | 100                       |
| Steamed P/ZSM-5 additive  | 95                        |

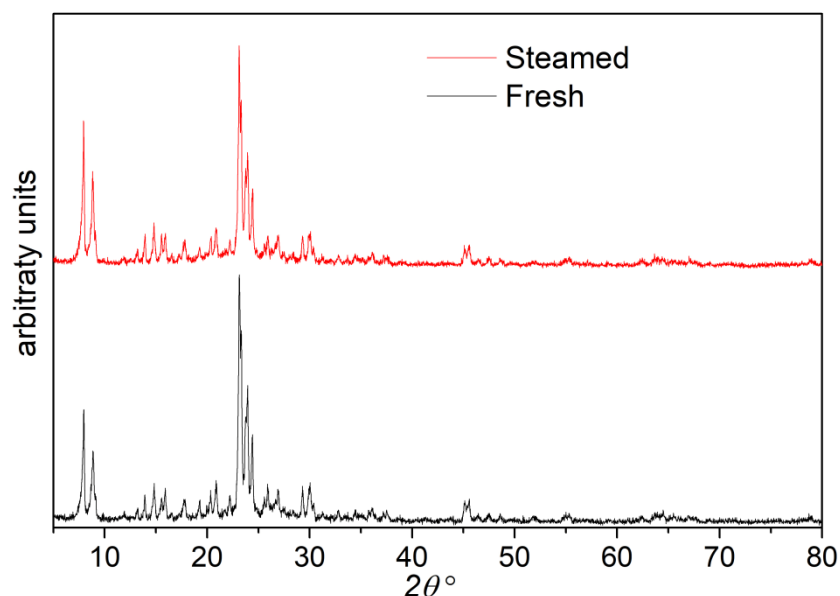

**Figure S1.** XRD patterns of fresh and steamed (at 770°C, 7 hrs, 50% steam/He) P/H-ZSM-5 zeolites

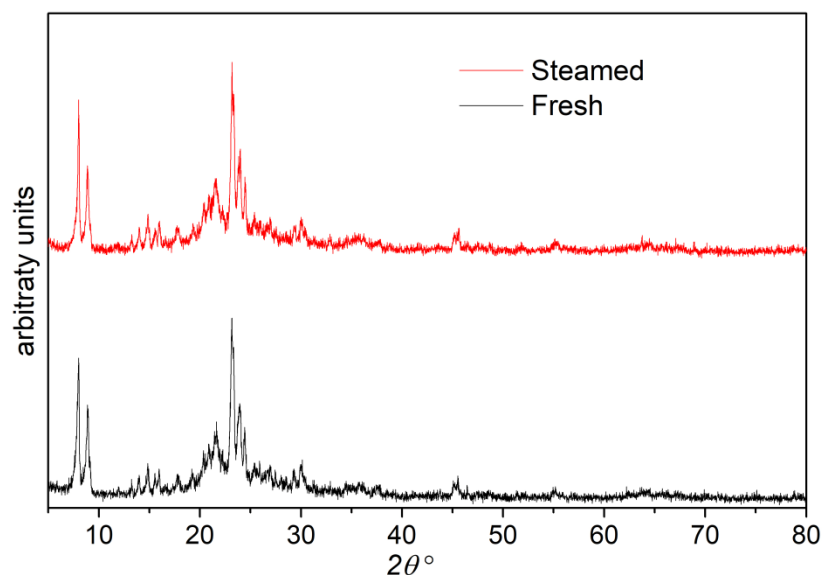

**Figure S2.** XRD patterns of the fresh-calcined and steamed (at 770°C, 7 hrs, 50% steam/He) P/ZSM-5 additive.

#### Pore size distribution curves (BJH analysis) of the catalysts

Figure S3 below show the pore size distribution curves based on the BJH analysis of the N<sub>2</sub> adsorption data of fresh-calcined and steamed P/H-ZSM-5 pure zeolite, of the fresh-calcined and steamed P/ZSM-5 additive and of the fresh and steamed SiO<sub>2</sub>-Al<sub>2</sub>O<sub>3</sub>; steaming conditions were 770°C, 7 hrs, 50% steam/He. The BJH curves of the fresh-calcined pure P/ZSM-5 zeolite and P/ZSM-5 additive were typical for microporous materials exhibiting no distinct peak in the micropore/small mesopore region. However, the P/ZSM-5 additive showed enhanced presence of

meso/macropores and external surface ( $> 100 \text{ \AA}$ ). On the other hand, the steamed analogues of both the pure zeolite and the additive exhibited also a peak at about  $20 \text{ \AA}$ , showing the formation of relatively smaller mesopores. With regard to the BJH curves of the  $\text{SiO}_2\text{-Al}_2\text{O}_3$  catalyst, they exhibit a characteristic peak at about  $56 \text{ \AA}$  which is shifted to about  $79 \text{ \AA}$  upon steaming, due to reorganization of the mesoporous framework.

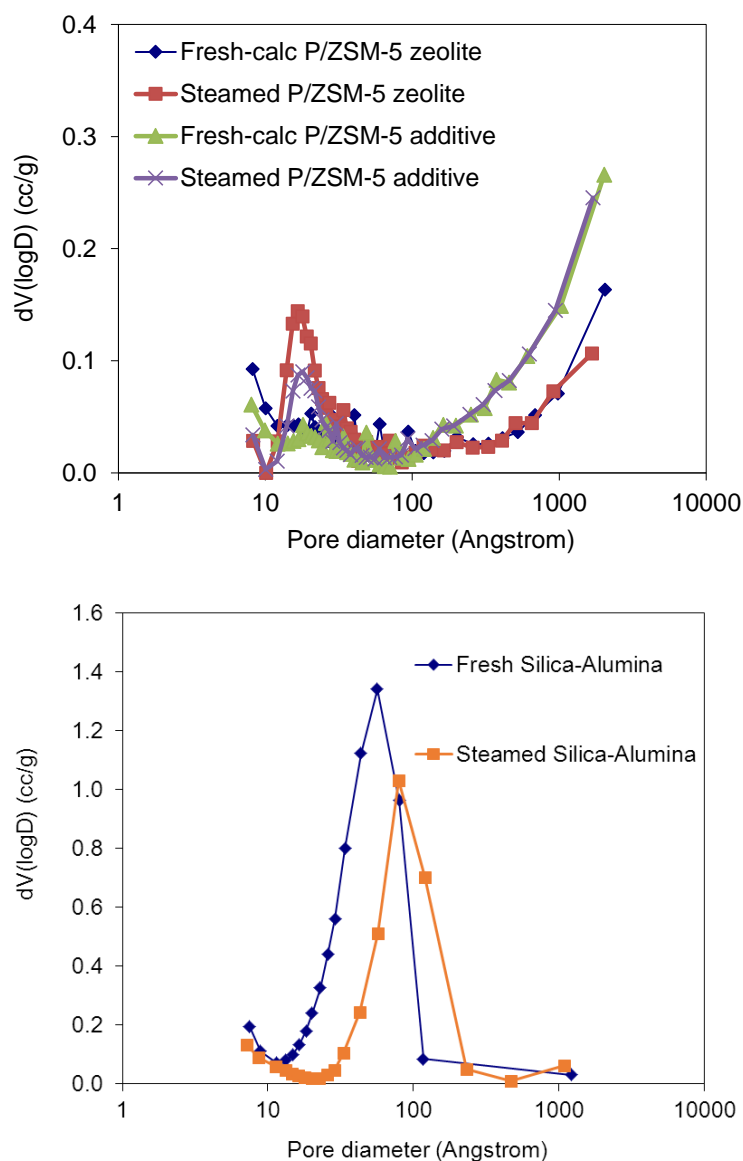

**Figure S3.** Pore size distribution curves based on the BJH analysis of the  $\text{N}_2$  adsorption data of fresh-calcined and steamed P/H-ZSM-5 pure zeolite, P/ZSM-5 additive and silica-alumina; steaming conditions were  $770^\circ\text{C}$ , 7 hrs, 50% steam/He.
